# Supplementary material
Source: PubMed Central journal article supplement (PMC5294887)
Supplement: mmc1.pdf [file mmc1.pdf]

## Supplemental Data

### **Biallelic Mutation of *ARHGEF18*, Involved in the Determination of Epithelial Apicobasal Polarity, Causes Adult-Onset Retinal Degeneration**

Gavin Arno, Keren J. Carss, Sarah Hull, Ceniz Zihni, Anthony G. Robson, Alessia Fiorentino, UK Inherited Retinal Disease Consortium, Alison J. Hardcastle, Graham E. Holder, Michael E. Cheetham, Vincent Plagnol, NIHR Bioresource - Rare Diseases Consortium, Timothy Aitman, Hana Alachkar, Sonia Ali, Louise Allen, David Allsup, Gautum Ambegaonkar, Julie Anderson, Richard Antrobus, Ruth Armstrong, Gavin Arno, Gururaj Arumugakani, Sofie Ashford, William Astle, Antony Attwood, Steve Austin, Chiara Bacchelli, Tamam Bakchoul, Tadbir K. Bariana, Helen Baxendale, David Bennett, Claire Bethune, Shahnaz Bibi, Maria Bitner-Glindzicz, Marta Bleda, Harm Boggard, Paula Bolton-Maggs, Claire Booth, John R. Bradley, Angie Brady, Matthew Brown, Michael Browning, Christine Bryson, Siobhan Burns, Paul Calleja, Natalie Canham, Jenny Carmichael, Keren Carss, Mark Caulfield, Elizabeth Chalmers, Anita Chandra, Patrick Chinnery, Manali Chitre, Colin Church, Emma Clement, Naomi Clements-Brod, Virginia Clowes, Gerry Coghlan, Peter Collins, Nichola Cooper, Amanda Creaser-Myers, Rosa DaCosta, Louise Daugherty, Sophie Davies, John Davis, Minka De Vries, Patrick Deegan, Sri V.V. Deevi, Charu Deshpande, Lisa Devlin, Eleanor Dewhurst, Rainer Doffinger, Natalie Dormand, Elizabeth Drewe, David Edgar, William Egner, Wendy N. Erber, Marie Erwood, Tamara Everington, Remi Favier, Helen Firth, Debra Fletcher, Frances Flinter, James C. Fox, Amy Frary, Kathleen Freson, Bruce Furie, Abigail Furnell, Daniel Gale, Alice Gardham, Michael Gattens, Neeti Ghali, Pavandeep K. Ghataorhe, Rohit Ghurye, Simon Gibbs, Kimberley Gilmour, Paul Gissen, Sarah Goddard, Keith Gomez, Pavel Gordins, Stefan Gräf, Daniel Greene, Alan Greenhalgh, Andreas Greinacher, Sofia Grigoriadou, Detelina Grozeva, Scott Hackett, Charaka Hadinnapola, Rosie Hague, Matthias Haimel, Csaba Halmagyi, Tracey Hammerton, Daniel Hart, Grant Hayman, Johan W.M. Heemskerk, Robert Henderson, Anke Hensiek, Yvonne Henskens, Archana Herwadkar, Simon Holden, Muriel Holder, Susan Holder, Fengyuan Hu, Aarnoud Huissoon, Marc Humbert, Jane Hurst, Roger James, Stephen Jolles, Dragana Josifova, Rashid Kazmi, David Keeling, Peter Kelleher, Anne M. Kelly, Fiona Kennedy, David Kiely, Nathalie Kingston, Ania Koziell, Deepa Krishnakumar, Taco W. Kuijpers, Dinakantha Kumararatne, Manju Kurian, Michael A. Laffan, Michele P. Lambert, Hana Lango Allen, Allan Lawrie, Sara Lear, Melissa Lees, Claire Lentaigne, Ri Liesner, Rachel Linger, Hilary Longhurst, Lorena Lorenzo, Rajiv Machado, Rob Mackenzie, Robert MacLaren, Eamonn Maher, Jesmeen Maimaris, Sarah Mangles, Ania Manson, Rutendo Mapeta, Hugh S. Markus, Jennifer Martin, Larahmie Masati, Mary Mathias, Vera Matser, Anna Maw, Elizabeth McDermott, Coleen McJannet, Stuart Meacham, Sharon Meehan, Karyn Megy, Sarju Mehta, Michel Michaelides, Carolyn M. Millar, Shahin Moledina, Anthony Moore, Nicholas Morrell, Andrew Mumford, Sai

## Supplemental data

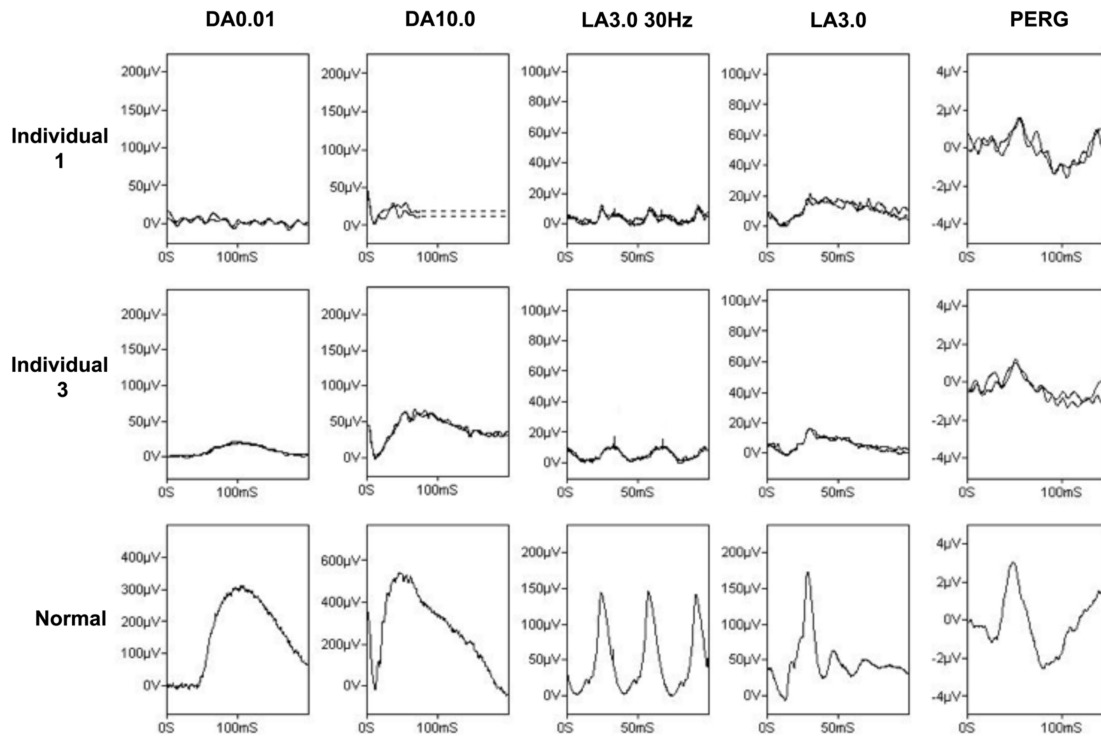

**Figure S1:** Full-field and pattern ERGs in individuals 1 and 3. DA: dark adapted; LA: light adapted. The numbers refer to flash strength ( $\text{cd}\cdot\text{s}/\text{m}^2$ ). The dim flash, rod-system specific ERG is severely reduced in individual 1; undetectable in individual 3. The bright flash DA 10 ERG is markedly subnormal in individual 1, and has a b-wave of lower amplitude than the a-wave in individual 3, perhaps suggesting the response to be arising in dark adapted cones in the absence of rod function. 30Hz flicker ERG is markedly reduced and delayed in individual 1; markedly reduced and of altered waveform in individual 3. Photopic single flash cone ERGs in both individuals are markedly subnormal and mildly delayed. PERG is mildly subnormal in both individuals. The findings are those of moderately severe (individual 1) or severe (individual 3) rod>cone dysfunction with macular involvement. Note difference in ERG amplitude scale in affected individuals compared with the representative normal traces.

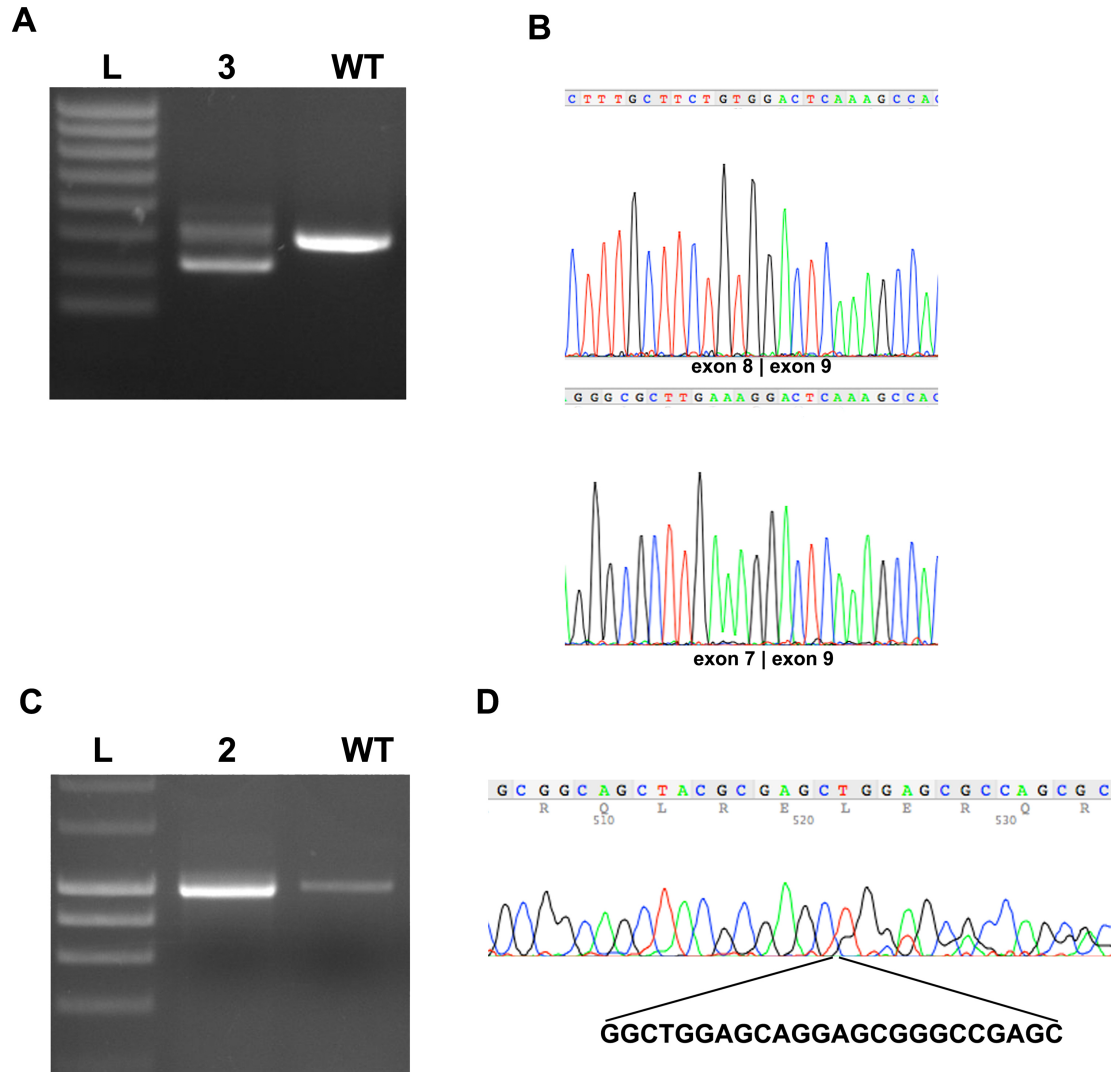

**Figure S2:** RT-PCR analysis of predicted splice-altering variants identified in *ARHGEF18*. **A:** Altered splicing due to c.1617+5G>A resulting in mixed transcripts comprising skipped exon 8 and wildtype (WT)(lane 3), L= ladder, WT= control RNA sample. **B:** Sanger sequencing of upper (top) and lower (bottom) bands from lane 3 showing normal splicing and skipping of exon 8 respectively. **C:** Mixed transcripts (lane 2) comprising c.2632G>T and c.2738\_2761del alleles showing no splice alteration. **D:** Sanger sequencing of lane 2 band showing mixed alleles with heterozygous deletion of 24 nucleotides corresponding to c.2738\_2761del.

**Table S1: Summary of *ARHGEF18* mutations**

|         | Individual | Genomic coordinates<br>(GRCh37) | cDNA change<br>(NM_001130955) | Protein consequence |
|---------|------------|---------------------------------|-------------------------------|---------------------|
| M1      | 1          | chr19:g.7509101A>G              | c.808A>G                      | p.Thr270Ala         |
| M2      | 1          | chr19:g.7527145C>T              | c.1996C>T                     | p.Arg666*           |
| M3      | 2          | chr19:g.7532286G>T              | c.2632G>T                     | p.Glu878*           |
| M4      | 2          | chr19:g.7532392_<br>7532415del  | c.2738_2761del                | p.Arg913_Glu920del  |
| M5      | 3          | chr19:g.7521294G>A              | c.1617+5G>A                   | p.Asp540Glyfs*63    |
| Control | N/A        | N/A                             | c.1252_1253delTAinsGC         | p.Tyr418Ala         |

(Control: GEF inactive mutant construct)



**Table S2:** Rare variants observed in genes associated with IRD in individuals 1-3

| Individual | HUGO    | Genotype     | HGVSc                                                                                       | HGVSp                                    | EXAC_AF     | Disease inheritance | Exclusion criteria                                                                                                      |
|------------|---------|--------------|---------------------------------------------------------------------------------------------|------------------------------------------|-------------|---------------------|-------------------------------------------------------------------------------------------------------------------------|
| 1          | GPR98   | Heterozygous | ENST00000405460.2:<br>c.2288A>G                                                             | ENSP00000384582.2:<br>p.Asp763Gly        | NA          | Recessive           | Heterozygous variant only/<br>does not fit phenotype                                                                    |
| 1          | NPHP3   | Heterozygous | ENST00000337331.5:<br>c.1189C>T                                                             | ENSP00000338766.5:<br>p.Arg397Cys        | 0.003303    | Recessive           | Heterozygous variant only/<br>does not fit phenotype                                                                    |
| 1          | GUCA1B  | Heterozygous | ENST00000230361.3:<br>c.253G>A                                                              | ENSP00000230361.3:<br>p.Val85Met         | 0.001359    | Dominant            | ExAC MAF too high for<br>dominant disease allele                                                                        |
| 1          | MYO7A   | Heterozygous | ENST00000409709.3:<br>c.3392A>G                                                             | ENSP00000386331.3:<br>p.His1131Arg       | 0.000008411 | Recessive           | Heterozygous variant only/<br>does not fit phenotype                                                                    |
| 1          | CDH23   | Heterozygous | ENST00000398788.3:<br>c.1591G>A                                                             | ENSP00000381768.3:<br>p.Gly531Ser        | 0.0004793   | Recessive           | Heterozygous variant only/<br>does not fit phenotype                                                                    |
| 1          | PROM1   | Heterozygous | ENST00000510224.1:<br>c.622delA                                                             | ENSP00000426809.1:<br>p.Thr208LeufsTer23 | 0.00005793  | Dominant/recessive  | Biallelic LOF variants in<br>PROM1 cause arRP - This<br>individual is a carrier of a<br>probable LOF allele in<br>PROM1 |
| 1          | RP1     | Heterozygous | ENST00000220676.1:<br>c.1118C>T                                                             | ENSP00000220676.1:<br>p.Thr373Ile        | 0.013       | Dominant/recessive  | ExAC MAF too high for<br>dominant disease allele                                                                        |
| 2          | PEX1    | Heterozygous | ENST00000248633.4:<br>c.1276A>G                                                             | ENSP00000248633.4:<br>p.Met426Val        | 0.000008237 | Recessive           | Heterozygous variant only/<br>does not fit phenotype                                                                    |
| 2          | ABCC6   | Heterozygous | ENST00000205557.7:<br>c.2836C>A                                                             | ENSP00000205557.7:<br>p.Leu946Ile        | 0.011       | Recessive           | Does not fit phenotype                                                                                                  |
| 2          | ABCC6   | Heterozygous | ENST00000205557.7:<br>c.3507-3C>T                                                           |                                          | 0.016       | Recessive           | Does not fit phenotype                                                                                                  |
| 2          | MAK     | Heterozygous | ENST00000313243.2:<br>c.174T>G                                                              | ENSP00000313021.2:<br>p.Asn58Lys         | 0.0002069   | Recessive           | Heterozygous variant only                                                                                               |
| 2          | HMX1    | Heterozygous | ENST00000400677.3:<br>c.233G>A                                                              | ENSP00000383516.3:<br>p.Gly78Asp         | NA          | Recessive           | Heterozygous variant only                                                                                               |
| 2          | AHI1    | Heterozygous | ENST00000367800.4:<br>c.2961+7_2961+21del<br>TTATTTTATGCAGTTI<br>nsGACTTTTTTAAAG<br>TTTTAAA |                                          | NA          | Recessive           | Heterozygous variant only                                                                                               |
| 2          | SLC24A1 | Heterozygous | ENST00000261892.6:<br>c.2813T>G                                                             | ENSP00000261892.6:<br>p.Val938Gly        | 0.000008276 | Recessive           | Heterozygous variant only/<br>does not fit phenotype                                                                    |
| 2          | IDH3B   | Heterozygous | ENST00000380851.5:<br>c.1133C>T                                                             | ENSP00000370232.5:<br>p.Ala378Val        | 0.00003295  | Recessive           | Heterozygous variant only                                                                                               |
| 2          | ARL13B  | Heterozygous | ENST00000394222.3:<br>c.1186C>G                                                             | ENSP00000377769.3:<br>p.Pro396Ala        | 0.006466    | Recessive           | Heterozygous variant only/<br>does not fit phenotype                                                                    |
| 2          | IMPDH1  | Heterozygous | ENST00000338791.6:                                                                          | ENSP00000345096.6:                       | 0.002224    | Dominant            | ExAC MAF too high for                                                                                                   |

|   |         |              | c.1108G>A                            | p.Ala370Thr                        |             |           | dominant disease allele                              |
|---|---------|--------------|--------------------------------------|------------------------------------|-------------|-----------|------------------------------------------------------|
| 2 | COL18A1 | Heterozygous | ENST00000359759.4:<br>c.1210G>A      | ENSP00000352798.4:<br>p.Ala404Thr  | 0.001865    | Recessive | Heterozygous variant only/<br>does not fit phenotype |
| 2 | IMPG2   | Heterozygous | ENST00000193391.7:<br>c.3038C>T      | ENSP00000193391.6:<br>p.Pro1013Leu | 0.003533    | Recessive | Heterozygous variant only                            |
| 2 | BBS12   | Heterozygous | ENST00000542236.1:<br>c.1190C>T      | ENSP00000438273.1:<br>p.Ala397Val  | 0.00001647  | Recessive | Heterozygous variant only/<br>does not fit phenotype |
| 2 | PDE6A   | Heterozygous | ENST00000255266.5:<br>c.718-4dupT    |                                    | 0.002018    | Recessive | Heterozygous variant only                            |
| 2 | CDHR1   | Heterozygous | ENST00000372117.3:<br>c.1868A>G      | ENSP00000361189.3:<br>p.Asn623Ser  | 0.004093    | Recessive | Heterozygous variant only                            |
| 2 | BBS2    | Heterozygous | ENST00000245157.5:<br>c.1231A>G      | ENSP00000245157.5:<br>p.Ile411Val  | NA          | Recessive | Heterozygous variant only/<br>does not fit phenotype |
| 3 | ABCA4   | Heterozygous | ENST00000370225:ex<br>on9:c.1140T>A  | ENSP00000359245.3:<br>p.Asn380Lys  | 0.0004942   | Recessive | Heterozygous variant only/<br>does not fit phenotype |
| 3 | GNAT2   | Heterozygous | ENST00000351050:ex<br>on8:c.896C>T   | ENSP00000251337.3:<br>p.Ala299Val  | 0.00004122  | Recessive | Heterozygous variant only/<br>does not fit phenotype |
| 3 | USH2A   | Heterozygous | ENST00000307340:ex<br>on15:c.3026C>G | ENSP00000305941.3:<br>p.Ala1009Gly | 0.000008347 | Recessive | Heterozygous variant only                            |
| 3 | TRPM1   | Heterozygous | ENST00000397795:ex<br>on27:c.3841G>A | ENSP00000380897.2:<br>p.Glu1281Lys | 0.006526    | Recessive | Heterozygous variant only/<br>does not fit phenotype |

**Table S3:** Predicted biallelic rare variants observed in individual 1:

| CHR | POSITION  | REFERENCE | OBSERVED | Genotype | EXAC_AF   | HUGO     | CONSEQUENCE      | HGVSc                       | HGVSp                          |
|-----|-----------|-----------|----------|----------|-----------|----------|------------------|-----------------------------|--------------------------------|
| 1   | 33235594  | C         | T        | HET      | 2.49E-05  | KIAA1522 | missense_variant | ENST00000401073.2:c.814C>T  | ENSP00000383851.2:p.Arg272Trp  |
| 1   | 33237743  | C         | G        | HET      | 5.79E-05  | KIAA1522 | missense_variant | ENST00000401073.2:c.2963C>G | ENSP00000383851.2:p.Ser988Cys  |
| 1   | 53793511  | T         | A        | HOM      | 0.0009537 | LRP8     | missense_variant | ENST00000306052.6:c.74A>T   | ENSP00000303634.6:p.Gln25Leu   |
| 2   | 189899700 | T         | A        | HET      | 0.0004942 | COL5A2   | missense_variant | ENST00000374866.3:c.4295A>T | ENSP00000364000.3:p.Asp1432Val |
| 2   | 189899755 | C         | T        | HET      | 0.0009884 | COL5A2   | missense_variant | ENST00000374866.3:c.4240G>A | ENSP00000364000.3:p.Asp1414Asn |
| 19  | 7509101   | A         | G        | HET      | NA        | ARHGEF18 | missense_variant | ENST00000359920.6:c.808A>G  | ENSP00000352995.4:p.Thr270Ala  |
| 19  | 7527145   | C         | T        | HET      | NA        | ARHGEF18 | stop_gained      | ENST00000359920.6:c.1996C>T | ENSP00000352995.4:p.Arg666Ter  |
| 22  | 46654636  | G         | C        | HET      | 0.0008484 | PKDREJ   | missense_variant | ENST00000253255.5:c.4584C>G | ENSP00000253255.5:p.Ile1528Met |
| 22  | 46658832  | C         | T        | HET      | NA        | PKDREJ   | missense_variant | ENST00000253255.5:c.388G>A  | ENSP00000253255.5:p.Val130Met  |

**Table S4:** Predicted biallelic rare variants observed in individual 2:

| CHR | POSITION  | REFERENCE             | OBSERVED             | Genotype | EXAC_AF   | HUGO     | CONSEQUENCE                            | HGVSc                                          | HGVSp                                 |
|-----|-----------|-----------------------|----------------------|----------|-----------|----------|----------------------------------------|------------------------------------------------|---------------------------------------|
| 2   | 152376170 | A                     | G                    | HET      | 0.0001159 | NEB      | splice_donor_variant                   | ENST00000397345.3:c.22590+2T>C                 |                                       |
| 2   | 152584331 | T                     | TGCTGGCT<br>GTGCCAGA | HET      | NA        | NEB      | inframe_insertion                      | ENST00000397345.3:c.153_167dupTCTGGCACAGCCAGC  | ENSP00000380505.3:p.Leu57_Ala61dup    |
| 3   | 65425560  | TCTGCTGCT<br>G        | T                    | HOM      | NA        | MAGI1    | inframe_deletion                       | ENST00000402939.2:c.1255_1263delCAGCAGCAG      | ENSP00000385450.2:p.Gln419_Gln421del  |
| 4   | 187584530 | G                     | A                    | HOM      | 0.004081  | FAT1     | missense_variant                       | ENST00000441802.2:c.3503C>T                    | ENSP00000406229.2:p.Ser1168Leu        |
| 5   | 77311370  | C                     | T                    | HET      | 0.003805  | AP3B1    | missense_variant&splice_region_variant | ENST00000255194.6:c.2995G>A                    | ENSP00000255194.6:p.Val999Met         |
| 5   | 77461466  | C                     | G                    | HET      | 0.0005687 | AP3B1    | missense_variant                       | ENST00000255194.6:c.1198G>C                    | ENSP00000255194.6:p.Ala400Pro         |
| 7   | 100674881 | G                     | A                    | HET      | 0.0002586 | MUC17    | splice_acceptor_variant                | ENST00000306151.4:c.185-1G>A                   | n/a                                   |
| 7   | 100685397 | G                     | A                    | HET      | 0.0001071 | MUC17    | missense_variant                       | ENST00000306151.4:c.1070G>A                    | ENSP00000302716.4:p.Arg3567His        |
| 8   | 21974516  | C                     | T                    | HET      | 0.0006927 | HR       | missense_variant                       | ENST00000381418.4:c.3250G>A                    | ENSP00000370826.4:p.Ala1084Thr        |
| 8   | 21978273  | G                     | A                    | HET      | 0.0004436 | HR       | missense_variant                       | ENST00000381418.4:c.2566C>T                    | ENSP00000370826.4:p.Arg856Trp         |
| 12  | 58016602  | AGCTGCCCA<br>GGATTCTG | A                    | HET      | 0.001812  | SLC26A10 | frameshift_variant                     | ENST00000320442.4:c.829_844delCCCAGGATTCTGGCTG | ENSP00000320217.4:p.Pro277ThrfsTer138 |
| 12  | 58016690  | G                     | C                    | HET      | 0.001738  | SLC26A10 | missense_variant                       | ENST00000320442.4:c.912G>C                     | ENSP00000320217.4:p.Lys304Asn         |
| 12  | 58016890  | T                     | G                    | HET      | 0.003328  | SLC26A10 | missense_variant                       | ENST00000320442.4:c.1023T>G                    | ENSP00000320217.4:p.Asn341Lys         |
| 14  | 45711988  | C                     | A                    | HET      | 0.003706  | MIS18BP1 | missense_variant                       | ENST00000310806.4:c.634G>T                     | ENSP00000309790.4:p.Ala2125Ser        |
| 14  | 45712000  | G                     | C                    | HET      | 0.0007413 | MIS18BP1 | missense_variant                       | ENST00000310806.4:c.622C>G                     | ENSP00000309790.4:p.Gln208Glu         |
| 14  | 102900798 | T                     | G                    | HET      | 0.0009748 | TECPR2   | missense_variant                       | ENST00000359520.7:c.1644T>G                    | ENSP00000352510.7:p.Asn548Lys         |
| 14  | 102916165 | C                     | T                    | HET      | 0.00411   | TECPR2   | missense_variant                       | ENST00000359520.7:c.3275C>T                    | ENSP00000352510.7:p.Ser1092Leu        |
| 16  | 16255424  | G                     | A                    | HET      | 0.016     | ABCC6    | splice_region_variant&intron_variant   | ENST00000205557.7:c.3507-3C>T                  | n/a                                   |
| 16  | 16263662  | G                     | T                    | HET      | 0.011     | ABCC6    | missense_variant                       | ENST00000205557.7:c.2836C>A                    | ENSP00000205557.7:p.Leu946Ile         |
| 16  | 23646857  | A                     | G                    | HOM      | 0.014     | PALB2    | missense_variant                       | ENST00000261584.4:c.1010T>C                    | ENSP00000261584.4:p.Leu337Ser         |

|    |          |                                       |   |     |           |          |                                      |                                                          |                                      |
|----|----------|---------------------------------------|---|-----|-----------|----------|--------------------------------------|----------------------------------------------------------|--------------------------------------|
| 16 | 31475712 | C                                     | A | HET | 0.0002853 | ARMC5    | splice_region_variant&intron_variant | ENST00000268314.4:c.1371-3C>A                            | n/a                                  |
| 16 | 31477594 | C                                     | G | HET | 0.001536  | ARMC5    | missense_variant                     | ENST00000268314.4:c.2192C>G                              | ENSP00000268314.4:p.Pro731Arg        |
| 16 | 88782205 | G                                     | C | HET | 0.0009697 | PIEZO1   | missense_variant                     | ENST00000301015.9:c.7374C>G                              | ENSP00000301015.9:p.Phe2458Leu       |
| 16 | 88789499 | G                                     | A | HET | 0.001903  | PIEZO1   | splice_region_variant&intron_variant | ENST00000301015.9:c.4495+4C>T                            | n/a                                  |
| 16 | 88798919 | G                                     | T | HET | 0.0009696 | PIEZO1   | missense_variant                     | ENST00000301015.9:c.2815C>A                              | ENSP00000301015.9:p.Leu939Met        |
| 17 | 55183792 | GGCTTGGAT<br>AGAAATGA<br>GGAGA        | G | HOM | NA        | AKAP1    | inframe_deletion                     | ENST00000337714.3:c.988_1008delAGCTTGGATAGAAATGAGGAG     | ENSP00000337736.3:p.Ser330_Glu336del |
| 19 | 7532286  | G                                     | T | HET | NA        | ARHGEF18 | stop_gained                          | ENST00000359920.6:c.2632G>T                              | ENSP00000352995.4:p.Glu878Ter        |
| 19 | 7532386  | GCGAGCGG<br>CTGGAGCA<br>GGAGCGGG<br>C | G | HET | NA        | ARHGEF18 | inframe_deletion                     | ENST00000359920.6:c.2738_2761delGGCTGGAGCAGGAGCGGGCCGAGC | ENSP00000352995.4:p.Arg913_Glu920del |
| 19 | 8130867  | G                                     | T | HET | 0.002926  | FBN3     | missense_variant                     | ENST00000600128.1:c.8366C>A                              | ENSP00000470498.1:p.Pro2789Gln       |
| 19 | 8138104  | C                                     | T | HET | 0.003295  | FBN3     | missense_variant                     | ENST00000600128.1:c.7780G>A                              | ENSP00000470498.1:p.Val2594Ile       |
| 22 | 46760604 | C                                     | T | HET | 0.0003229 | CELSR1   | missense_variant                     | ENST00000262738.3:c.8584G>A                              | ENSP00000262738.3:p.Gly2862Ser       |
| 22 | 46762275 | G                                     | A | HET | 1.67E-05  | CELSR1   | splice_region_variant&intron_variant | ENST00000262738.3:c.8300+8C>T                            | n/a                                  |

**Table S5:** Predicted biallelic rare variants observed in individual 3:

| CHR | POSITION  | REFERENCE | OBSERVED | Genotype | EVS MAF  | HUGO       | Exonic Function   | AAChange                    |                                 |
|-----|-----------|-----------|----------|----------|----------|------------|-------------------|-----------------------------|---------------------------------|
| 1   | 158908291 | C         | G        | HET      | NA       | PYHIN1     | nonsynonymous SNV | ENST00000368140:c.370C>G    | ENSP00000357122.9:p.Arg124 Gly  |
| 1   | 158908881 | A         | C        | HET      | 0.000154 | PYHIN1     | nonsynonymous SNV | ENST00000368140:c.423A>C    | ENSP00000357122.9:p.Lys141 Asn  |
| 8   | 31001099  | T         | A        | HOM      | NA       | WRN        | nonsynonymous SNV | ENST00000298139:c.3343T>A   | ENSP00000298139.5:p.Cys111 5Ser |
| 12  | 114387907 | T         | A        | HOM      | 0.001922 | RBM19      | nonsynonymous SNV | ENST00000261741:c.1053A>T   | ENSP00000261741.5:p.Lys351 Asn  |
| 19  | 7521294   | G         | A        | HOM      | NA       | ARHGEF18   |                   | ENST00000359920:c.1617+5G>A | n/a                             |
| 19  | 8175953   | C         | T        | HET      | 0.001153 | FBN3       | nonsynonymous SNV | ENST00000270509:c.4199G>A   | ENSP00000270509.2:p.Arg140 Gln  |
| 19  | 8188682   | C         | T        | HET      | 0.001008 | FBN3       | nonsynonymous SNV | ENST00000270509:c.2942G>A   | ENSP00000270509.2:p.Arg981 Gln  |
| 22  | 21044431  | G         | A        | HOM      | NA       | POM121L4 P | nonsynonymous SNV | ENST00000412250:c.113G>A    | n/a                             |
| 22  | 22042011  | G         | A        | HOM      | 0.000308 | PPIL2      | nonsynonymous SNV | ENST00000335025:c.977G>A    | ENSP00000334553.8:p.Arg326 Gln  |

**Table S6:** Additional biallelic rare (ExAC MAF≤0.005) variants of unknown significance in *ARHGEF18* present in 4 individuals with unrelated phenotypes in the UCL exome cohort of 5695 individuals.

| Individual | dbSNP       | Genomic coordinates (GRCh37) | cDNA change (NM_001130955) | Protein consequence | Genotype     | Homozygous individuals in gnomAD dataset | Causative mutation identified | SIFT, Polyphen2 prediction |
|------------|-------------|------------------------------|----------------------------|---------------------|--------------|------------------------------------------|-------------------------------|----------------------------|
| A          | rs375852625 | chr19:g.7505169G>A           | c.343G>A                   | p.Gly115Arg         | homozygous   | 0                                        | no                            | D, PD                      |
| B          | rs200483329 | chr19:g.7516147C>T           | c.1286C>T                  | p.Thr429Met         | homozygous   | 0                                        | yes                           | D, PD                      |
| C          | rs28489511  | chr19:g.7505332C>A           | c.506C>A                   | p.Pro169Gln         | heterozygous | 13                                       | no                            | T, B                       |
| C          | rs74497723  | chr19:g.7506936A>T           | c.794A>T                   | p.Tyr265Phe         | heterozygous | 9                                        | no                            | T, B                       |
| D          | rs368588291 | chr19:g.6516071G>A           | c.1210G>A                  | p.Val404Leu         | homozygous   | 0                                        | yes                           | D, Poss D                  |

D=Damaging, PD=Probably Damaging, T=Tolerated, B=Benign, Poss D=Possibly Damaging  
gnomAD dataset: available at: <http://gnomad.broadinstitute.org/>

**Table S7: Clinical summary**

| Individual, family number | Age of onset, years, symptoms                           | Age at last review (length of review), years | Presenting VA logMAR (Snellen)   | Latest VA logMAR (Snellen)        | Latest refractive error, dioptres        | Fundus features                                                                                                                                                                     | Age at last electrophysiology, key findings                                                                                                                                    | Colour vision                      | Visual fields                                                                                                                                                     | Other findings                                                            |
|---------------------------|---------------------------------------------------------|----------------------------------------------|----------------------------------|-----------------------------------|------------------------------------------|-------------------------------------------------------------------------------------------------------------------------------------------------------------------------------------|--------------------------------------------------------------------------------------------------------------------------------------------------------------------------------|------------------------------------|-------------------------------------------------------------------------------------------------------------------------------------------------------------------|---------------------------------------------------------------------------|
| Individual 1<br>GC18203   | 20 yrs reduced acuity, mild nyctalopia, blind spots     | 37 (8)                                       | R 0.3 (20/40)<br>L 0.18 (20/30)  | R 0.6 (20/80)<br>L 0.6 (20/80)    | R 0/-0.50 x 100<br>L +1.00/-0.75 x 110   | Irregular peripheral pigment, pale discs, cystoid macular edema, vitreous opacities, attenuated sheathed vessels, peripheral retinal exudate                                        | 30, subnormal PERG, rod specific ERG markedly subnormal, bright flash subnormal with unusual bifid b waves, cone specific delayed and subnormal; profound rod>cone dysfunction | Ishihara age 29 R 17/17<br>L 13/17 | Octopus visual fields age 36 central 20-30 degrees retained on R, 30-50 degrees on L, age 37 24-2 central scotomas, fields now constricted to 15 degrees each eye | Nil else                                                                  |
| Individual 2<br>GC3626    | 29, photopsia, slightly reduced acuity, mild nyctalopia | 51 (22)                                      | R 0.48 (20/60)<br>L 0.3 (20/40)  | R 1.8 (20/1250)<br>L 1.5 (20/630) | R -1.00/-1.00 x 5<br>L +0.75/-1.00 x 90  | Irregular pigmented lesions in periphery, pale discs, cystoid macular edema, peripheral telangiectasia with some retinal edema and vitreous cells, possible para-arteriolar sparing | 29, no identifiable responses other than a minimal, delayed response to 30Hz flicker (PERG, EOG and ERG tested); severe photoreceptor dysfunction                              | Ishihara age 29 15/15 each eye     | Goldmann visual fields age 29: ring scotoma at 30 degrees, binocular Esterman age 36: central 20 degrees only retained                                            | L Fuch's heterochromic cyclitis                                           |
| Individual 3<br>GC17880   | 30, photopsia, nyctalopia and field defects             | 38 (8)                                       | R 0.18 (20/30)<br>L 0.48 (20/60) | R 0.18 (20/30)<br>L 0.8 (20/125)  | R +2.25/-1.00 x 5<br>L +2.00/-1.50 x 165 | Irregular pigmented lesions in periphery, foveal/parafoveal cysts                                                                                                                   | 30, PERG borderline on R, subnormal on L, undetectable rod ERG, abnormal cone ERG; severe rod>cone dysfunction                                                                 | Ishihara age 33 R 21/23 L 3/23     | Fields to confrontation age 36 years less than 30 degrees                                                                                                         | Left band keratopathy<br>Wolf-Parkinson White syndrome,<br>4 miscarriages |
